# Supplementary material for: Evaluation of commercially-available conductive filaments for 3D printing flexible circuits on paper
Source: PeerJ journal article supplement (doi:10.7717/peerj-matsci.21), 2022-04-25
Supplement: revised_supplemental_information.pdf [file revised_supplemental_information.pdf]

**Supplemental information for:**

**Evaluation of commercially-available conductive  
filaments for 3D printing flexible circuits on paper**

Aditya R. Jangid<sup>1</sup>, E. Brandon Strong<sup>1</sup>, Jacqueline Chuang<sup>2</sup>, Andres W. Martinez<sup>3</sup>, and  
Nathaniel W. Martinez<sup>1\*</sup>

<sup>1</sup>Department of Biological Sciences, California Polytechnic State University, San Luis  
Obispo, CA, USA

<sup>2</sup>Department of Biomedical Engineering, California Polytechnic State University, San  
Luis Obispo, CA, USA

<sup>3</sup>Department of Chemistry and Biochemistry, California Polytechnic State University,  
San Luis Obispo, CA, USA

**\*Corresponding Author:**

Nathaniel W. Martinez<sup>1</sup>

1 Grand Avenue, Building 33 Room 379, San Luis Obispo, CA 93407, USA

Email address: nmarti32@calpoy.edu

**Figure S1**

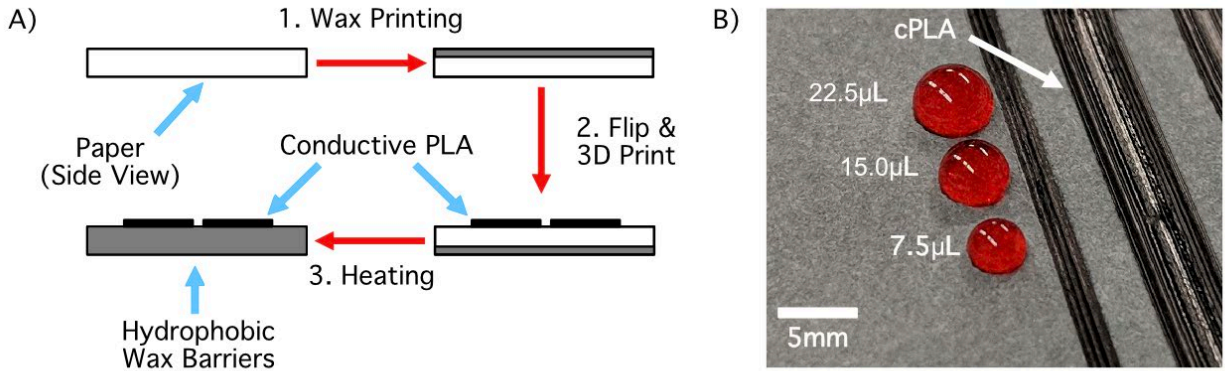

**Figure S1.** Making hydrophobic paper-based circuits via wax printing. A) Flowchart of the process for combining 3D printing with wax printing. Hydrophobic wax is first deposited on one side of the paper using a solid-ink printer. The paper is then flipped, and traces are 3D printed on the back of the paper. Finally, the paper is heated to reflow the wax and make the entire paper hydrophobic. B) Photograph of various sized droplets of red dye next to conductive traces on hydrophobic paper.

**Figure S2**

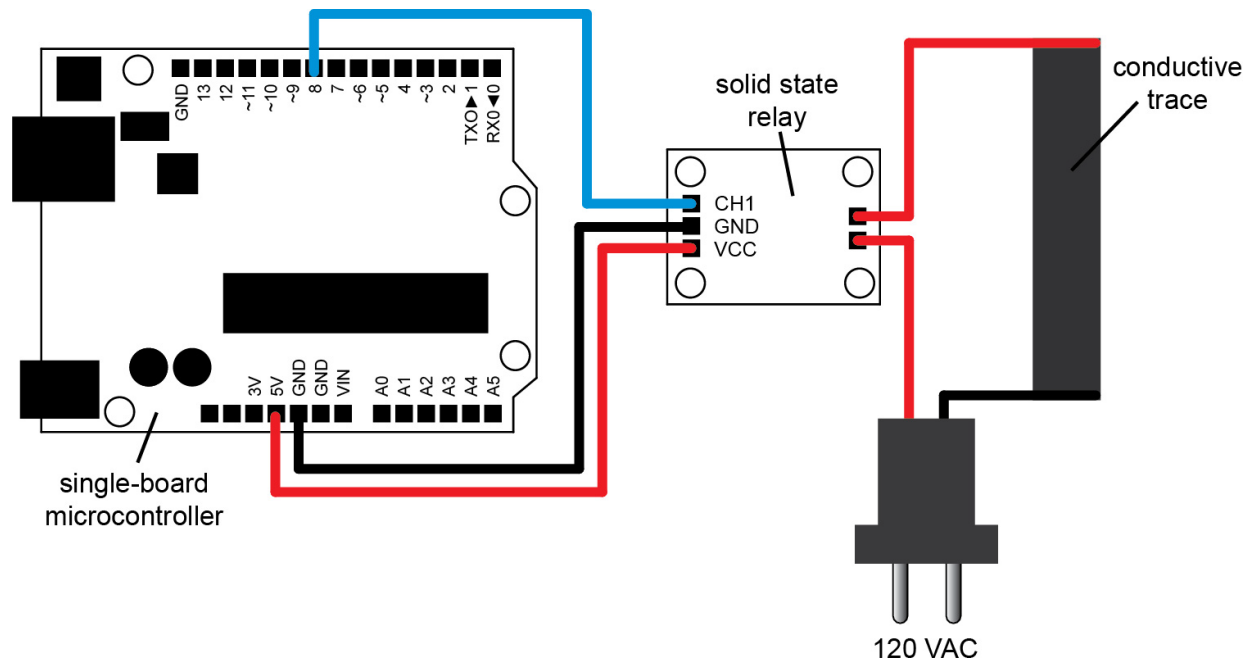

**Figure S2.** Schematic diagram of the circuit used to supply power to the conductive traces when they were used as resistive heaters. An 8-channel solid state relay was used for the experiments, but a single-channel solid state relay is depicted in the diagram for simplicity.

**Figure S3**

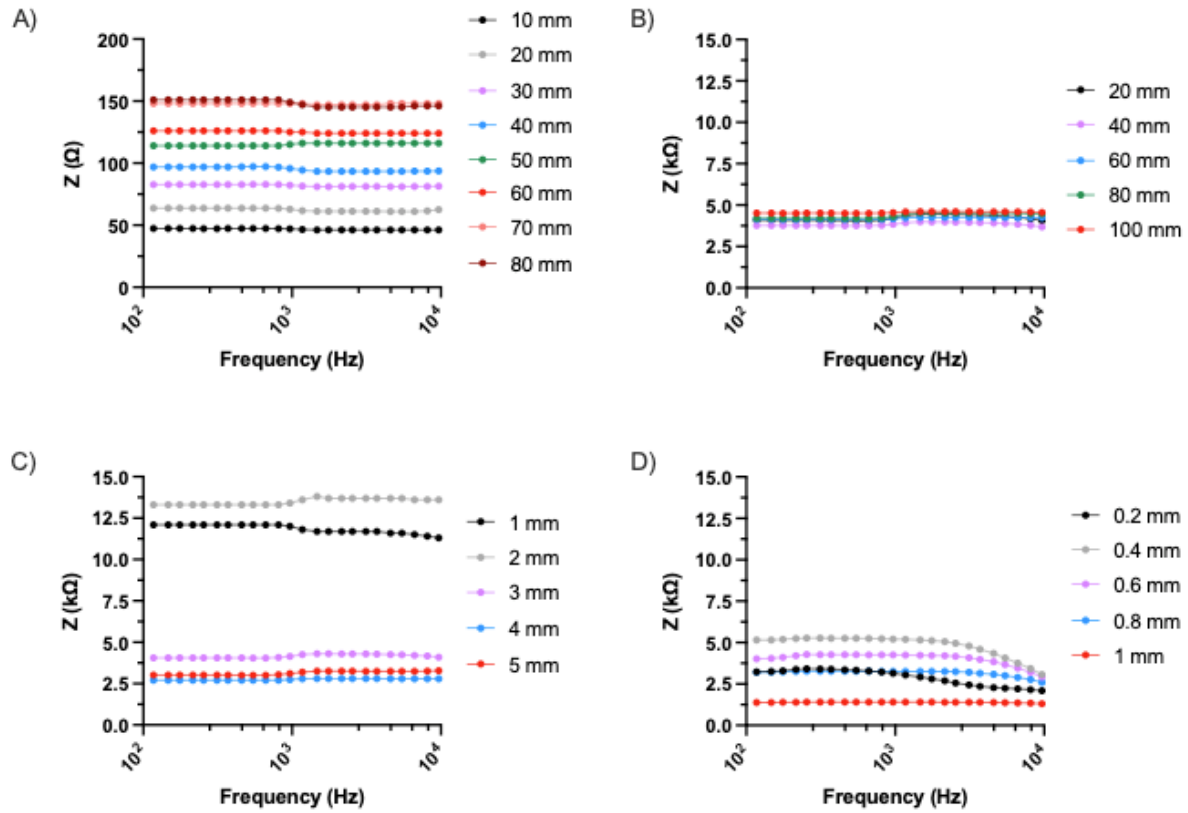

**Figure S3.** Characterization of Electrifi and BuMat traces printed on Whatman Grade 3 Chr paper. A) Effect of Electrifi trace length on impedance. All traces were 3-mm wide and 0.6-mm high. B) Effect of BuMat trace length on impedance. All traces were 3-mm wide and 0.6-mm high. C) Effect of BuMat trace width on impedance. All traces were 30-mm long and 0.6-mm high. D) Effect of BuMat trace height on impedance. All traces were 30-mm long and 3-mm wide. The effects of width and height on the impedance of Electrifi traces were not characterized due to the difficulty of printing the material and subsequent poor print quality.

**Figure S4**

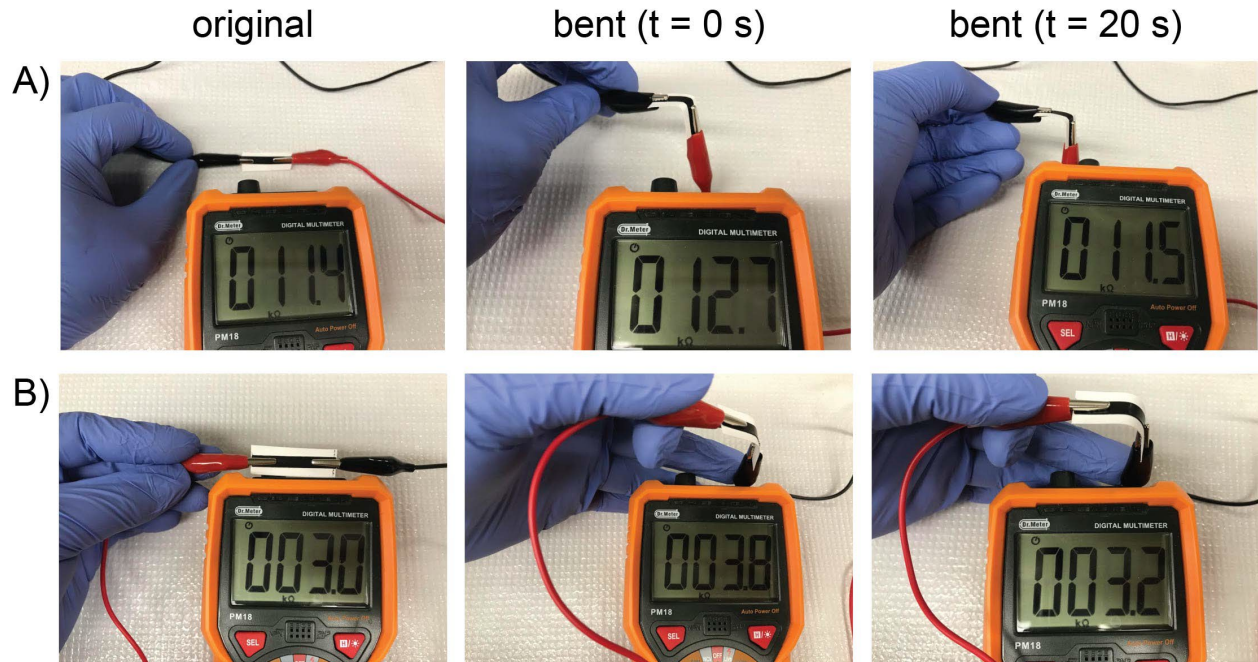

**Figure S4.** Photographs depicting the effect of bending two different traces (A and B) on their electrical resistance. The resistance of the traces increased significantly upon bending the traces to a 90° angle, but then equilibrated within ~20 s to a value that was close to the original resistance. Similar results were obtained for 10 traces with different dimensions. All traces were printed using Protopasta on Whatman Grade 3 Chr paper.

**Figure S5**

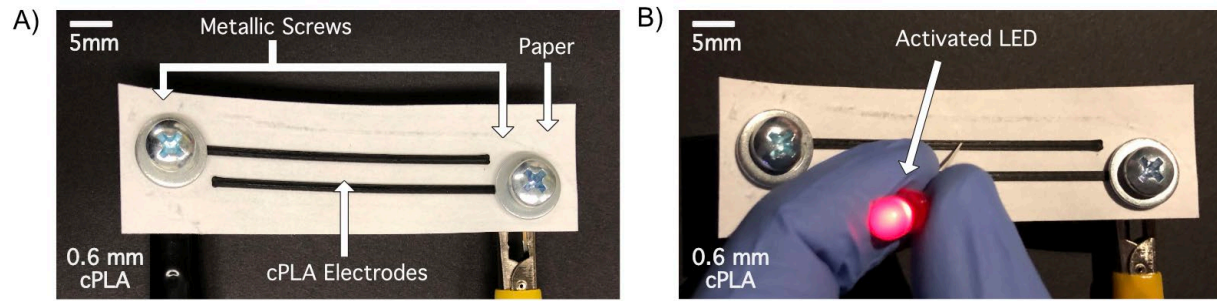

**Figure S5.** Photographs of screw terminal interfaces with 3D printed Protopasta traces (A), and an activated LED to demonstrate the functionality of this interfacing modality (B).

**Figure S6**

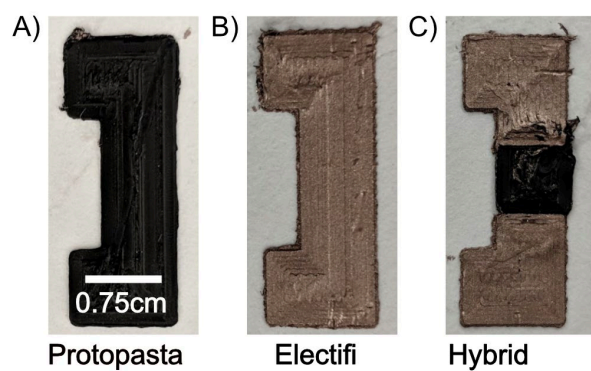

**Figure S6.** Hybrid conductive traces containing both Electrifi (higher conductivity) and Protopasta (lower conductivity) elements. A) Protopasta trace. B) Electrifi trace. C) Hybrid trace. The Protopasta center could serve as a resistor.

**Figure S7**

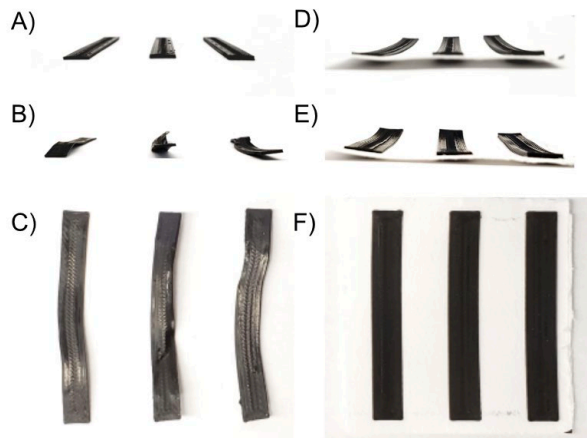

**Figure S7.** Effect of heating freestanding and paper-based Protopasta traces. A-C) Freestanding Protopasta traces before (A) and after (B and C) being heated to ~100 °C (21% duty cycle). D-F) Protopasta traces printed on paper before (D) and after (E and F) being heated to ~100 °C (21% duty cycle).

**Tables S1.** Summary of commercially-available conductive filaments. The first three filaments were used in this study. The remaining filaments were not tested but since they are all made from similar polymers and materials, we expect that these other filaments could also be 3D printed on paper.

| Conductive filament       | Polymer   | Conductive material | Cost (\$/g) | Resistivity ( $\Omega$ -cm) | References |
|---------------------------|-----------|---------------------|-------------|-----------------------------|------------|
| Protoplant Protopasta     | PLA       | graphite            | 0.10        | 15                          | 1-4        |
| Multi 3D Electrifi        | polyester | copper              | 1.80        | 0.006                       | 1-3, 5     |
| BuMat                     | ABS       | graphite            | 0.05        | N/A                         | 6, 7       |
| Amolen                    | PLA       | N/A                 | 0.11        | 1.42                        | 1, 2, 8    |
| 3dk 3dkonductive          | PLA       | carbon black        | 0.17        | 24                          | 1, 2, 9    |
| Jaycar                    | PLA       | graphene            | 0.06        | 6                           | 1, 2, 10   |
| G6 Materials BlackMagic3D | PLA       | graphene            | 1.00        | 0.6                         | 1-3, 11    |
| 3D Printer Pro            | ABS       | carbon fiber        | 0.10        | N/A                         | 12         |

## References

- (1) TheMechNinja <https://themechninja.com/01/most-conductive-3d-filaments-top-7/#Sunlu> (accessed Feb 21, 2022)
- (2) All3DP <https://all3dp.com/2/conductive-filament-brands-compared/> (accessed Feb 21, 2022)
- (3) Flowers, P. F.; Reyes, C.; Ye, S.; Kim, M. J.; Wiley, B. J. 3D Printing Electronic Components and Circuits with Conductive Thermoplastic Filament. *Addit. Manuf.* **2020**, *18* (2017), 156–163. <https://doi.org/10.1016/j.addma.2017.10.002>.
- (4) Protoplant <https://www.proto-pasta.com/collections/conductive/products/conductive-pla> (accessed Feb 21, 2022)
- (5) Multi3D <https://www.multi3dllc.com/product/electrifi/> (accessed Feb 21, 2022)
- (6) BuMat <https://www.bumatusa.com/> (accessed Feb 21, 2022)
- (7) Amazon <https://www.amazon.ca/BuMat-Conductive-Filament-2-2-Pound-Printing/dp/B00O5WY8HU> (accessed Feb 21, 2022)

- (8) Amolen <https://amolen.com/> (accessed Feb 21, 2022)
- (9) 3dk <https://3dk.berlin/en/special/169-3dkonductive.html> (accessed Feb 21, 2022)
- (10) Jaycar <https://www.jaycar.com.au/> (accessed Feb 21, 2022)
- (11) Palenzuela, C. L. M.; Novotny, F.; Krupicka, P.; Sofer, Z.; Pumera, M. 3D-Printed Graphene/Poly(lactic Acid) Electrodes Promise High Sensitivity in Electroanalysis. *Anal. Chem.* **2018**, *90* (9), 5753–5757.  
<https://doi.org/10.1021/acs.analchem.8b00083>.
- (12) 3D Printer Pro <http://www.3dprinterpro.com/> (accessed Feb 21, 2022)
